# Supplementary material for: Active control of all-fibre graphene devices with electrical gating
Source: PubMed Central journal article supplement (PMC4410643; doi:10.1038/ncomms7851), 2015-04-21
Supplement: ncomms7851-s1.pdf [file ncomms7851-s1.pdf]

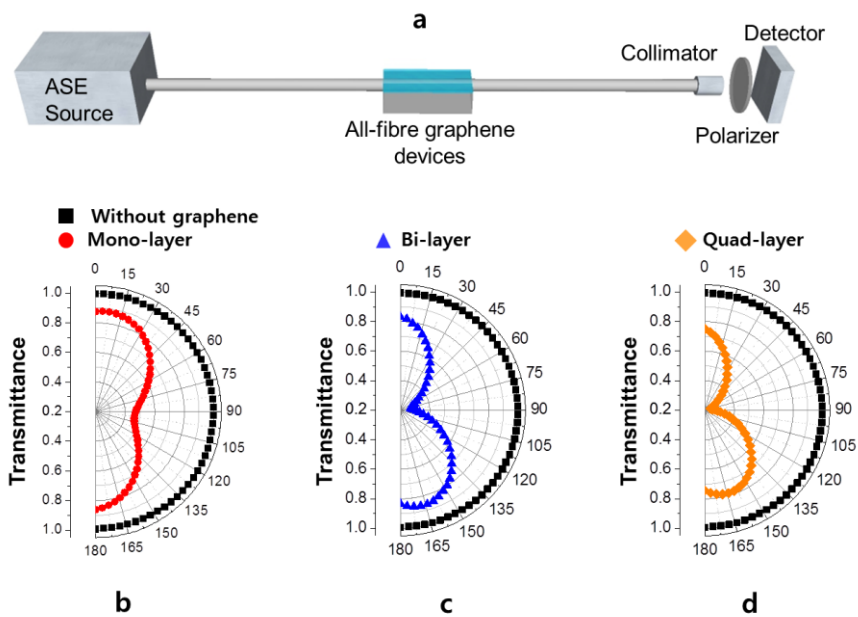

**Supplementary Figure 1: Experimental measurement of polarization-dependent absorption properties in all-fibre graphene devices.** **a.** Schematic of experimental set-up including an amplified spontaneous emission (ASE) source around 1550 nm, an in-line collimator, a linear polarizer, and a photo-detector. **b.- d.** Angular plot of optical transmission of the devices. **b.** The device with a mono-layer graphene shows the maximum transmission ( $\sim 88\%$ ) at  $7.6^\circ$  with minimum transmission ( $\sim 46\%$ ) at almost normal ( $97.1^\circ$ ) to that of maximum where TE-polarization direction corresponds to  $90^\circ$  degree **c.** Same measurement with bi-layer graphene shows the maximum transmission ( $\sim 86\%$ ) at  $167^\circ$  with minimum transmission ( $\sim 27\%$ ) at  $77.5^\circ$ . **d.** The angles at maximum ( $\sim 78\%$ ) and minimum transmission ( $\sim 24\%$ ) were measured to be  $163.7^\circ$  and  $74.5^\circ$ , respectively, for quad-layer sample. In all samples, the angle at minimum transmission is randomly distributed around  $90 \pm 15^\circ$  and the angle at maximum is nearly normal at the accuracy within  $\pm 1^\circ$ . A shift of the angle from the polarization direction of TE- and TM-modes is expected to be originated from the induced birefringence by the SPF buried into the quartz block with a curvature and the magnetic block to hold the optical fibres. The devices without graphene show nearly angle-independent transmission (black square).

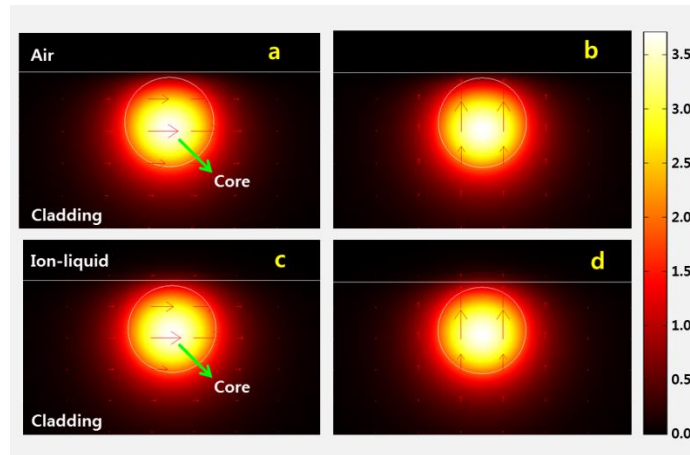

**Supplementary Figure 2: Numerical calculation of field enhancement on the SPF surface by ion-liquid.**

The electric field distribution and polarization direction of the fundamental guided mode in the SPF were numerically calculated using a commercial software (COMSOL Multiphysics®) where the optical fibre, core-cladding index difference and minimum distance between core-boundary and polished surface were set as 8.3  $\mu\text{m}$ , 0.36%, and 0.5  $\mu\text{m}$ , respectively. The electric field distribution and polarization direction of **a.** TE- and **b.** TM-mode without ion-liquid. The relative intensity ratio at polished surface with respect to maximum intensity ( $I_{\text{surface}}/I_{\text{max}}$ ) was 0.36% and 0.17% for TE- and TM-mode, respectively. **c.** TE- and **d.** TM-mode with ion-liquid. The calculated  $I_{\text{surface}}/I_{\text{max}}$  was 4.05% and 4.00% for TE- and TM-mode respectively.

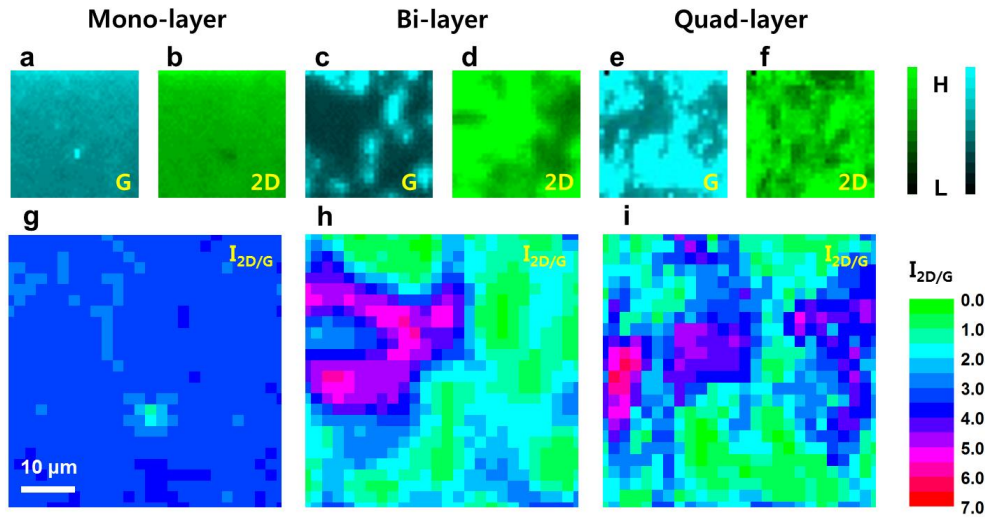

**Supplementary Figure 3: Raman measurement and images in randomly stacked graphene layers.** Spatial distribution of relative Raman intensity between 2D-peak and G-peak ( $I_{2D/G}$ ) recorded by a commercial Raman microscopy (inVia Raman microscope, Renishaw plc). A light with central wavelength of 514 nm was focused on the graphene samples using an objective lens (Numerical Aperture = 0.5, 20X). Raman spectra at 729 (=  $27 \times 27$ ) different points have been taken over the area of  $50 \times 50 \mu\text{m}^2$  of the individual graphene samples with a focused spot size of  $\sim 1 \mu\text{m}^2$ . **a.-f.** Raman intensity image around G peak and 2D peak of the sample (**a.** and **b.** mono-layer graphene, **c.** and **d.** bi-layer graphene, **e.** and **f.** quad-layer graphene) **g.-i.** Calculated  $I_{2D/G}$  distribution of **g.** mono-layer graphene, **h.** bi-layer graphene and **i.** quad-layer graphene samples extracted from each measurement. While the monolayer graphene exhibits almost uniform distribution of  $I_{2D/G}$  2.9 ~ 3.6 over the most area, the  $I_{2D/G}$  in multilayer graphene samples show broad distribution ranging from 0.4 to 6. In particular, they hold smaller  $I_{2D/G}$  than that of mono-layer graphene over substantial area (73.4% and 64.3% for bi- and quad-layer graphenes, respectively) of the sample.

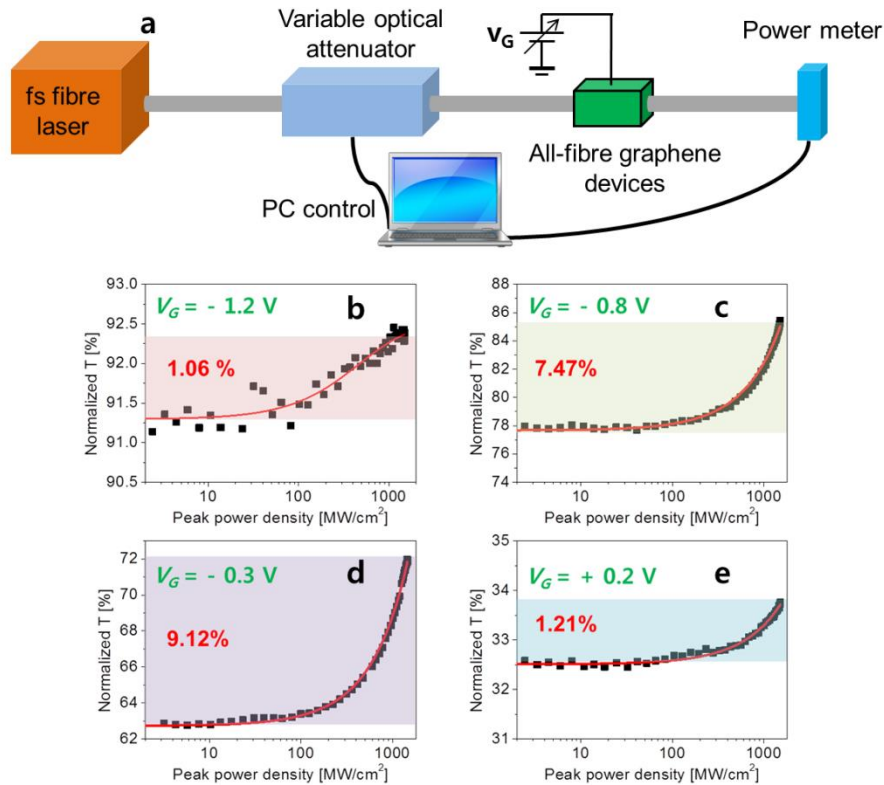

**Supplementary Figure 4: Gate-variable nonlinear transmission properties of TE mode in the all-fibre graphene device using a bi-layer graphene.** **a.** Schematic of nonlinear measurement setup using a lab-built mode-locked fibre laser, a polarization controller, a variable optical attenuator, and an optical power meter. **b.-e.** Normalised nonlinear transmission curves at the applied gate voltages of **b.**  $-1.2 \text{ V}$ , **c.**  $-0.8 \text{ V}$ , **d.**  $-0.3 \text{ V}$  and **e.**  $+0.2 \text{ V}$ . The nonlinear fitting (red solid line) of experimental results (black solid square) shows the modulation depth of 1.06 % with a saturation fluence of  $256.6 \text{ MW}/\text{cm}^2$  at the  $V_G$  of  $-1.2 \text{ V}$ . There is more significant nonlinear optical transmission change for  $V_G$  of  $-0.8 \text{ V}$  (7.47 %) and  $-0.3 \text{ V}$  (9.12%) though the absorption could not be fully saturated due to the limit of currently available input power of the source. In case of  $V_G$  at  $+0.2 \text{ V}$ , only 1.21% of the nonlinear optical transmission change was observed for a given maximum input power because of the limited input power and increased saturation fluence of the graphene SA.

### Supplementary Note. 1: Dielectric constant of graphene depending on Femi-energy

We calculated the dielectric constant of graphene  $\varepsilon_g(\omega)$  from<sup>1</sup>

$$\varepsilon_g(\omega) = \varepsilon_\infty + \frac{i\sigma(\omega)}{\varepsilon_0\omega d}, \quad (1)$$

where  $\varepsilon_\infty$  (= 2.5) is the background dielectric constant of graphene,  $\varepsilon_0$  vacuum permittivity,  $d$  (= 0.335 nm) the graphene thickness. The frequency  $\omega$  and Femi-energy  $E_F$  dependent optical conductivity  $\sigma(\omega)$  is obtained with

$$\sigma(\omega) = \frac{2e_0^2 k_B T}{\pi \hbar^2} \frac{i}{\omega + i\Gamma} \log(2 \cosh(\frac{E_F}{2k_B T})) + \frac{e_0^2}{4\hbar^2} \left\{ H\left(\frac{\omega}{2}\right) + \frac{4i\omega}{\pi} \int_0^\omega d\epsilon \frac{H(\omega) - H\left(\frac{\epsilon}{2}\right)}{\omega^2 - 4\epsilon^2} \right\}, \quad (2)$$

$$H(\epsilon) = \frac{\sinh(\hbar\epsilon/k_B T)}{\cosh(E_F/k_B T) + \cosh(\hbar\epsilon/k_B T)}, \quad (3)$$

where  $e_0$  denotes the elementary charge,  $k_B$  the Boltzmann constant,  $T$  temperature,  $\hbar$  Plank constant, and  $\Gamma$  the decay rate of electron plasma. By using this model we obtained the refractive index ( $n$ ) and the attenuation coefficient ( $\kappa$ ) as a function of Fermi energy at the wavelength of 1.55  $\mu\text{m}$ . For example, as the Fermi energy increases from 0 to 0.4 eV, the complex refractive index of graphene varies from  $3.2165 + 2.622i$  to  $3.3689 + 2.2777i$ .

### Supplementary Reference

1. Falkovsky, L. A. Optical properties of graphene. *J. Phys. Conf. Ser.* **129**, 012004, (2008).
